# Supplementary material
Source: PubMed Central journal article supplement (PMC11287450)
Supplement: NIHMS1991091-supplement-35121404-2.pdf [file NIHMS1991091-supplement-35121404-2.pdf]

**Supplementary Figure 2. Progression of prediagnostic IgA and IgG antibody levels over time.** IgA and IgG antibody progression in individual patients with Epstein-Barr virus small RNA 1 in situ hybridization (EBER-ISH) positive NPC (A and B), EBER-ISH negative NPC (C to E), and NPC with unknown EBER-ISH status (F to I).

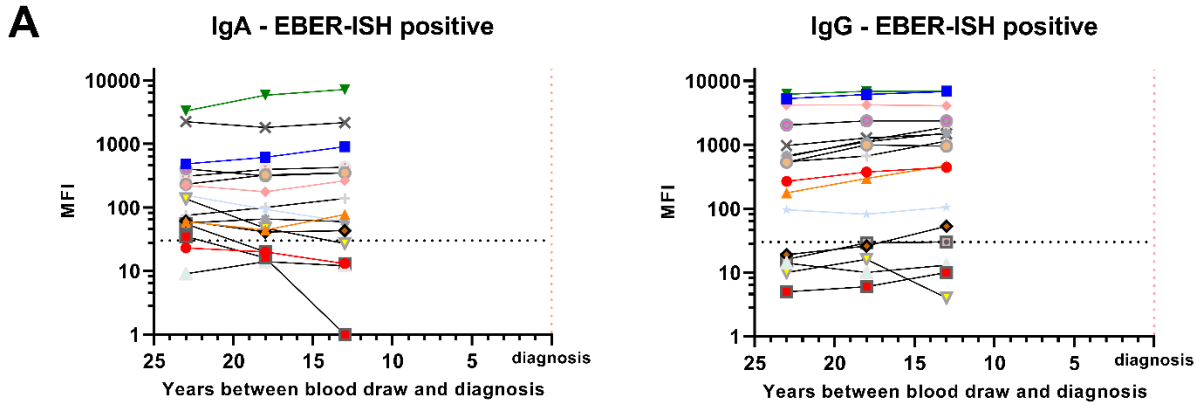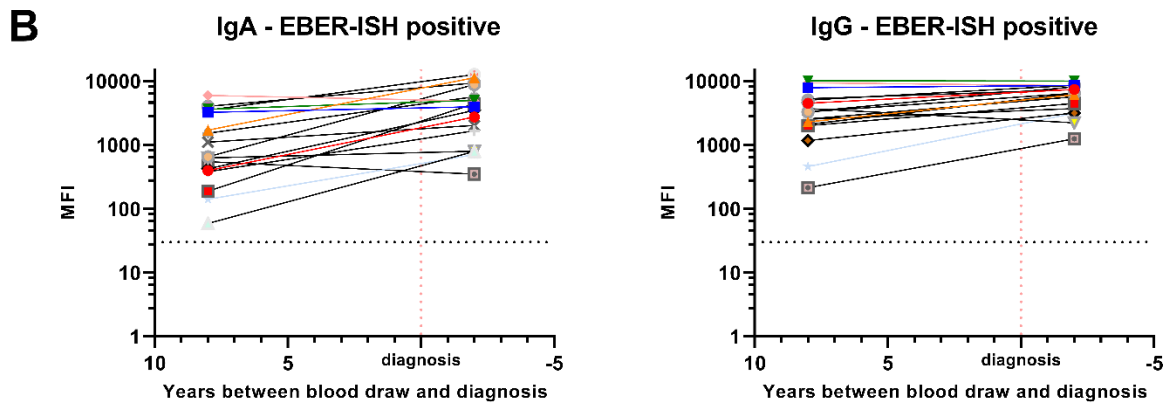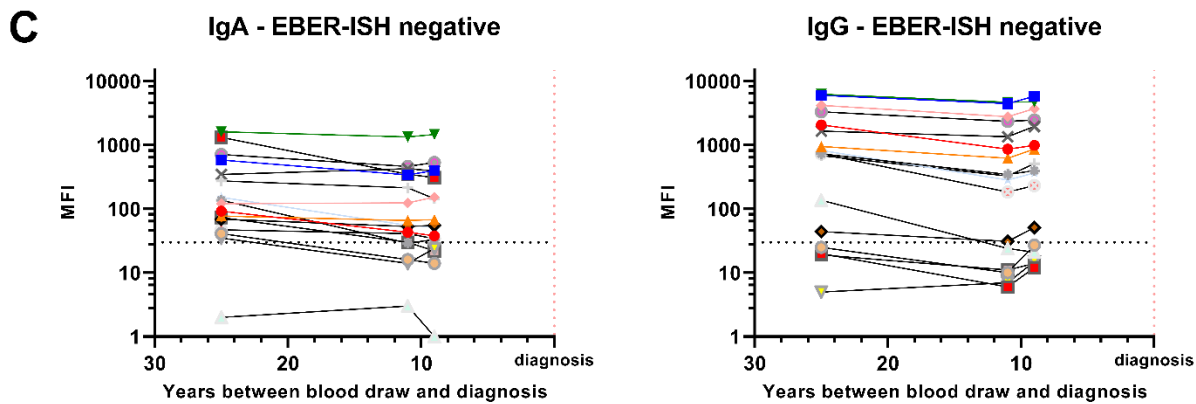

**D****IgA - EBER-ISH negative**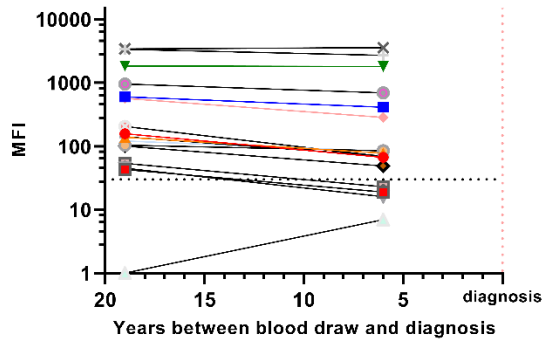**IgG - EBER-ISH negative**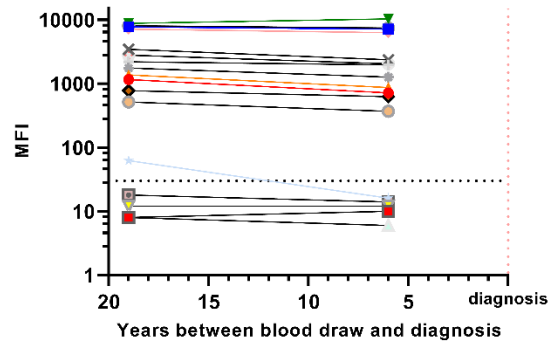**E****IgA - EBER-ISH negative**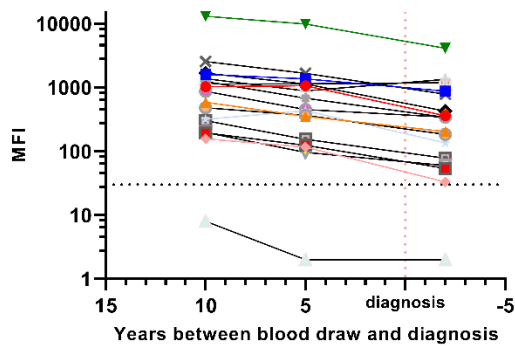**IgG - EBER-ISH negative**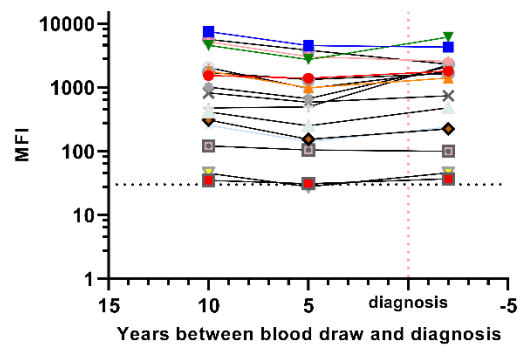**F****IgA - EBER-ISH unknown**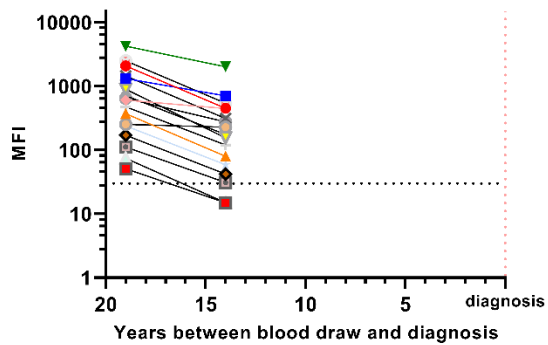**IgG - EBER-ISH unknown**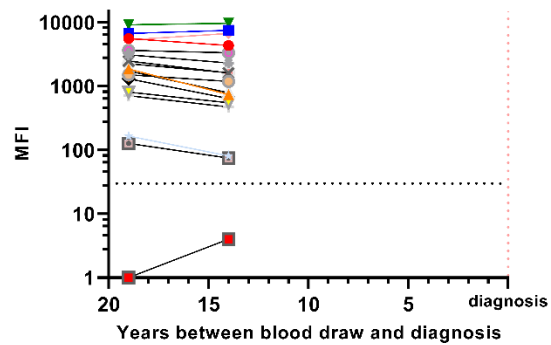

**G****IgA - EBER-ISH unknown**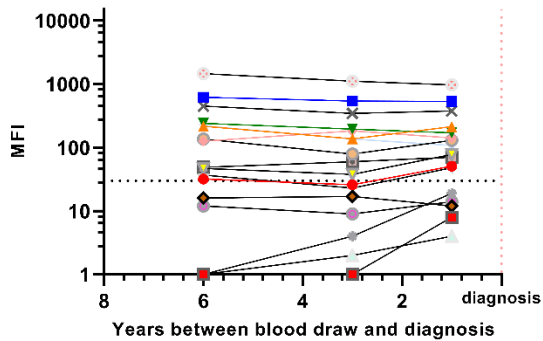**IgG - EBER-ISH unknown**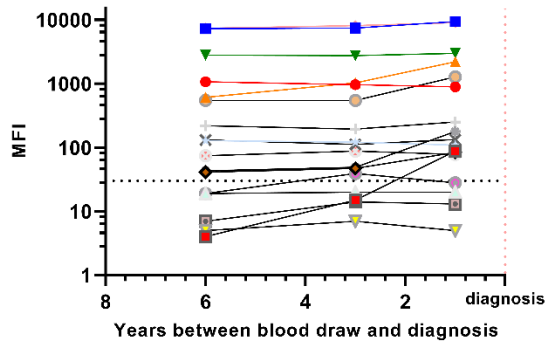**H****IgA - EBER-ISH unknown**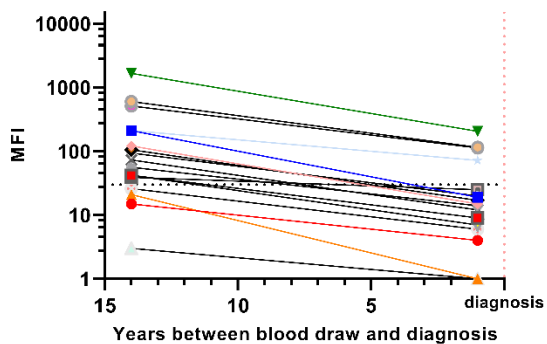**IgG - EBER-ISH unknown**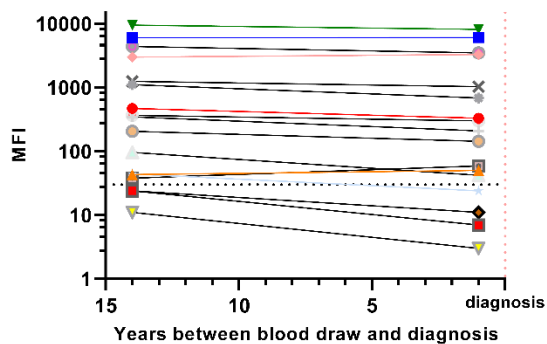**I****IgA - EBER-ISH unknown**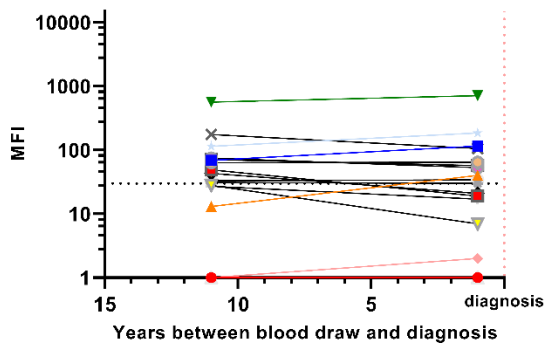**IgG - EBER-ISH unknown**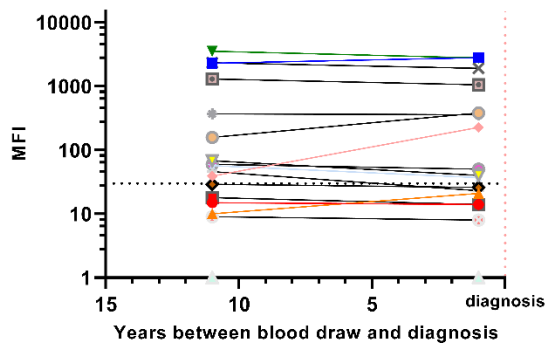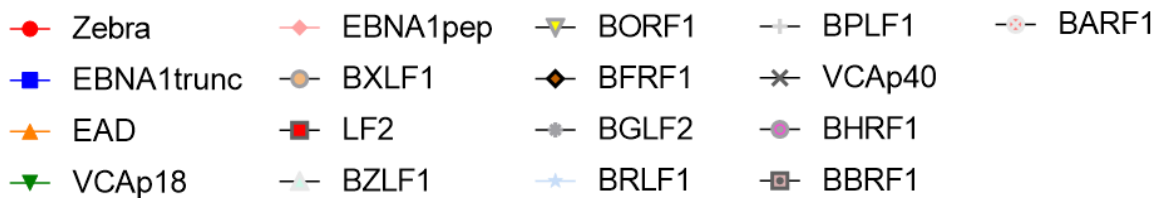

MFI = Median fluorescence intensity
