# Supplementary material
Source: PubMed Central journal article supplement (PMC11287450)
Supplement: NIHMS1991091-supplement-35121404.pdf [file NIHMS1991091-supplement-35121404.pdf]

**Supplementary Figure 1. Median fluorescence intensity (MFI) values for 15 IgA and IgG antibodies.** MFI values of all incident cases were split into Epstein-Barr virus small RNA 1 in situ hybridization (EBER-ISH) positive cases, EBER-ISH negative cases, cases with unknown EBER-ISH status and controls. For serial samples, only the sample closest to diagnosis was included. Cut-offs are based on receiver operating characteristic (ROC) analysis to yield 90% seronegatives in the control group, i.e. 90% specificity.

**Zebra IgA**

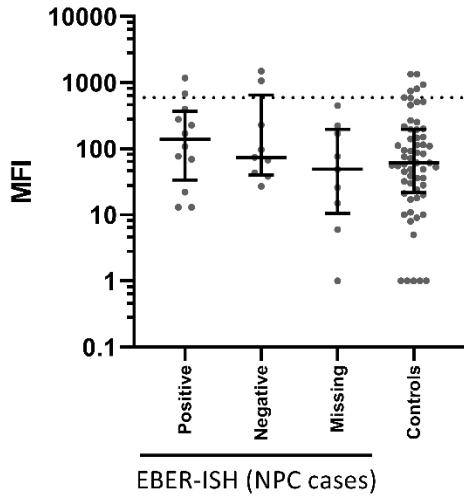

**EBNA1trunc IgA**

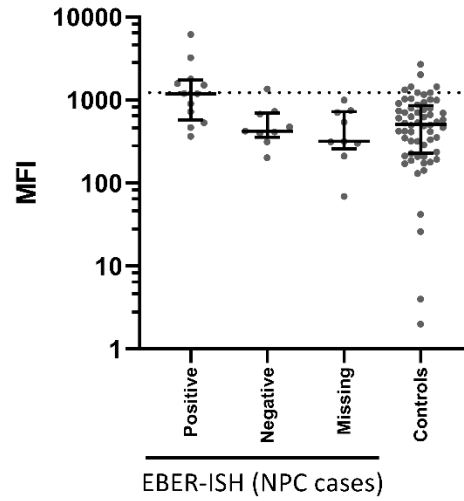

**EA-D IgA**

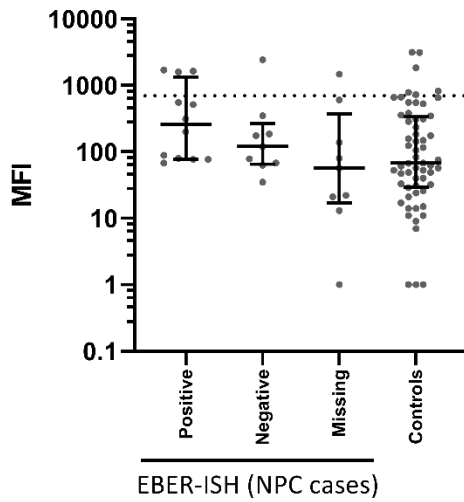

**VCAp18 IgA**

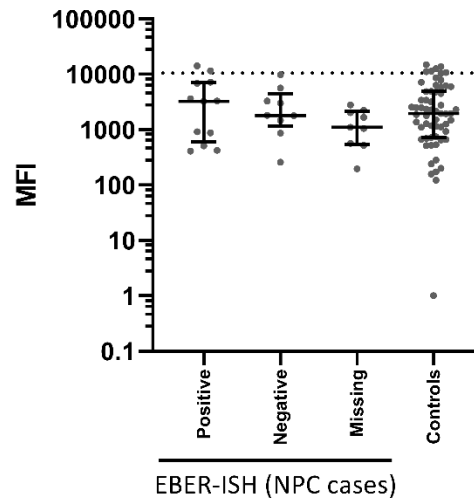

**EBNA1pep IgA**

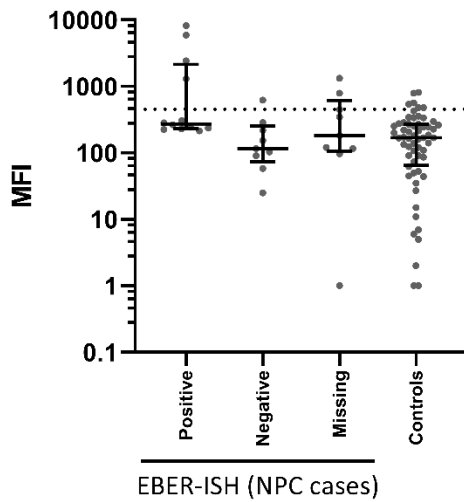

**BXLF1 IgA**

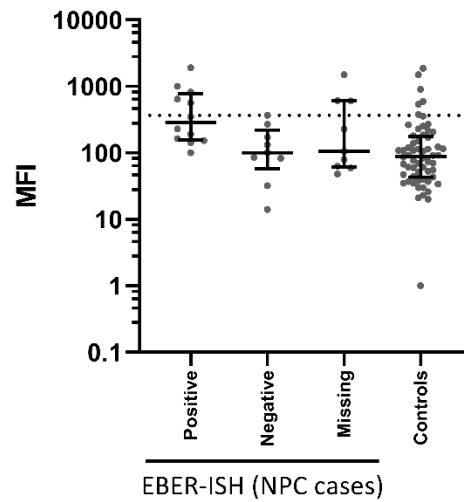

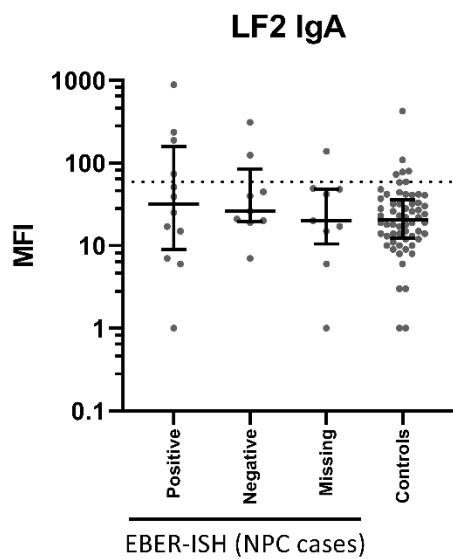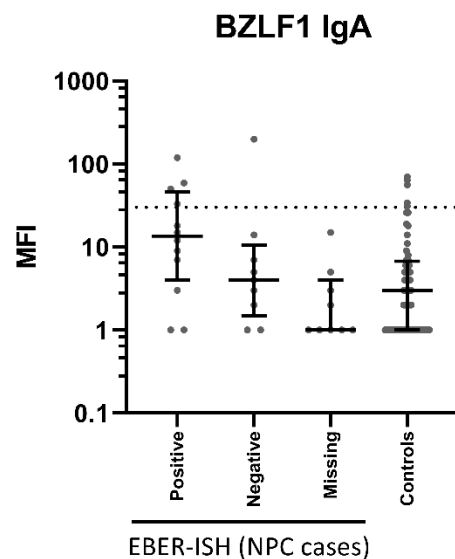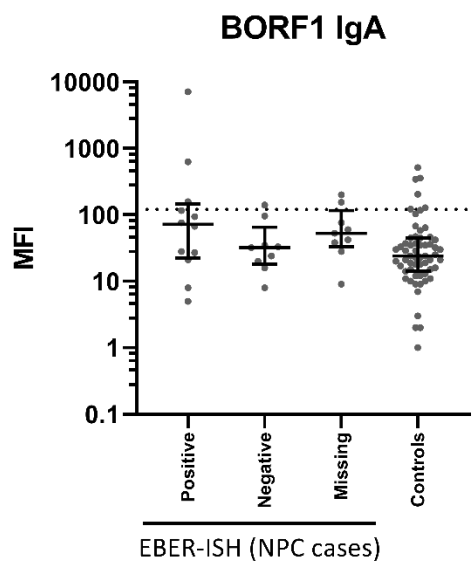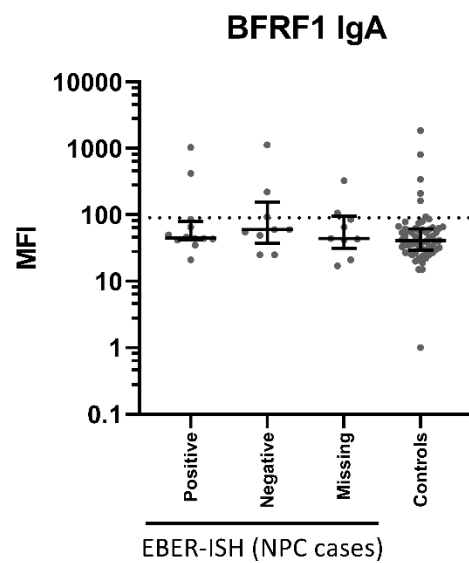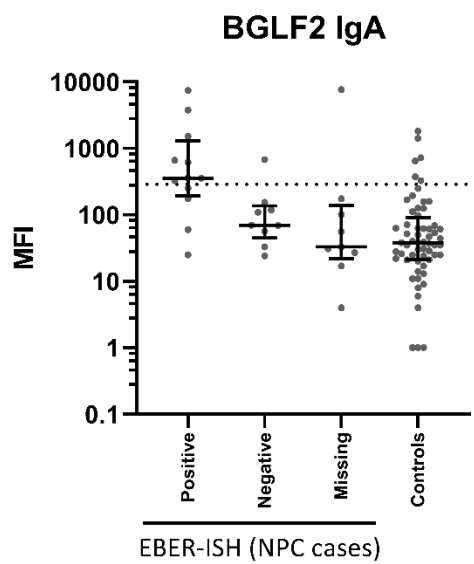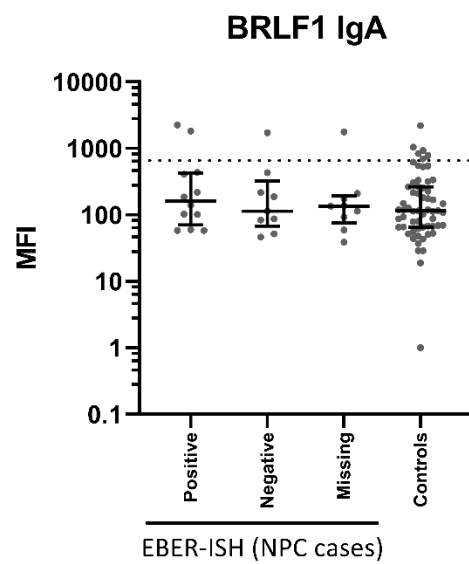

**BPLF1 IgA**

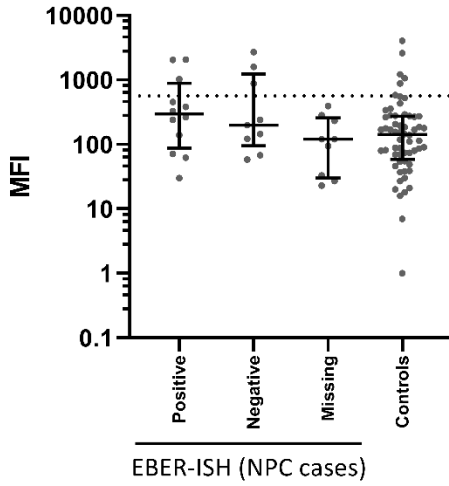

**VCAp40 IgA**

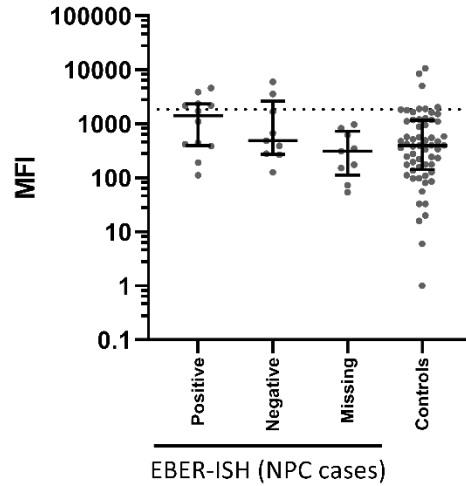

**BHRF1 IgA**

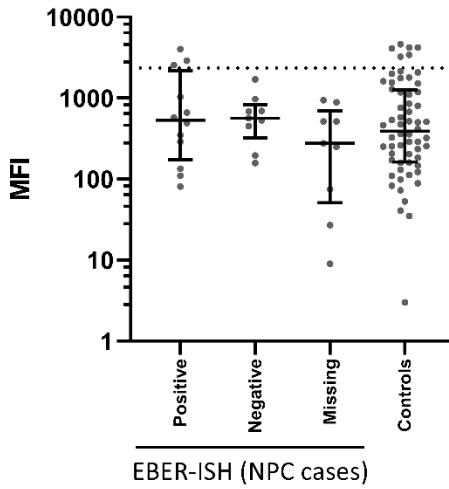

**BBRF1 IgA**

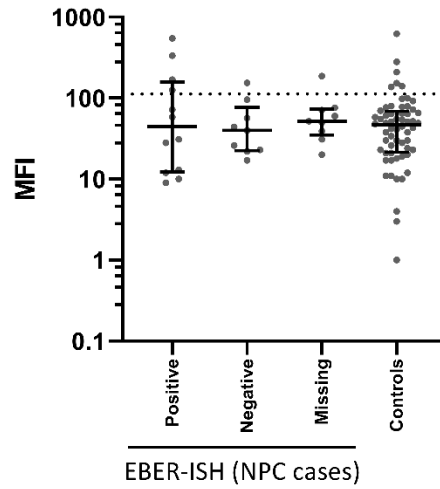

**BaRF1 IgA**

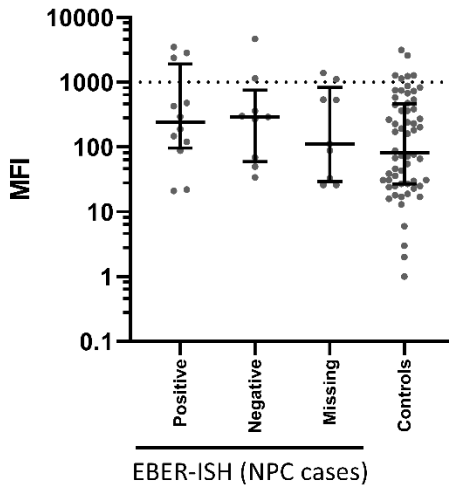

MFI = Median fluorescence intensity

**Zebra IgG**

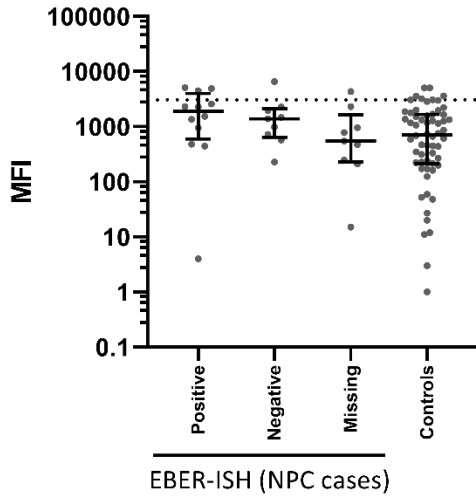

**EBNA1trunc IgG**

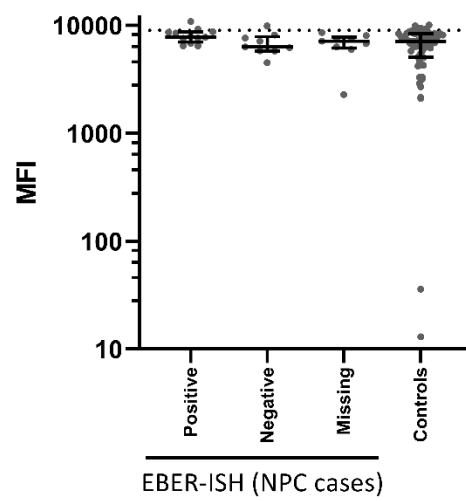

**EA-D IgG**

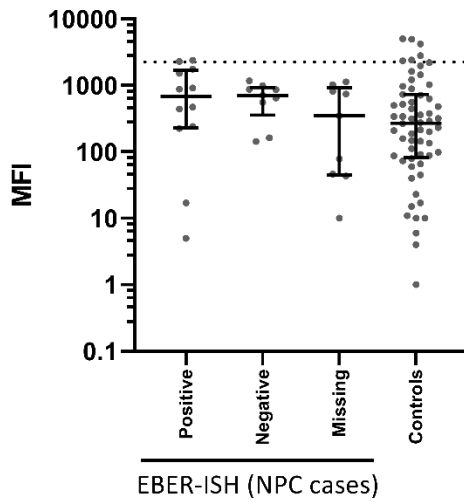

**VCAP18 IgG**

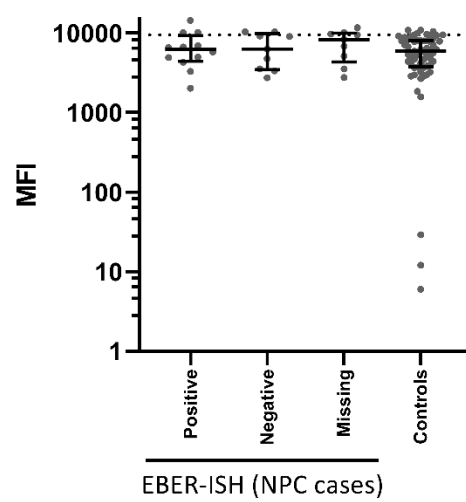

**EBNA1pep IgG**

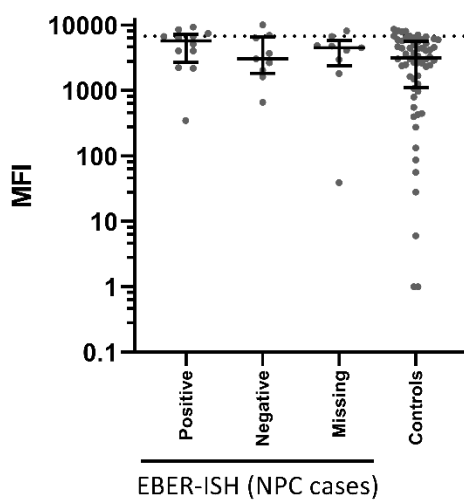

**BXLF1 IgG**

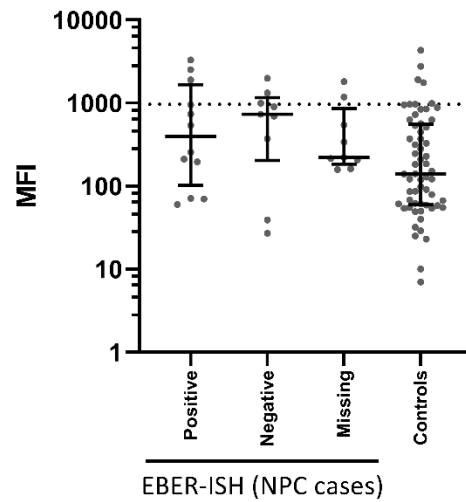

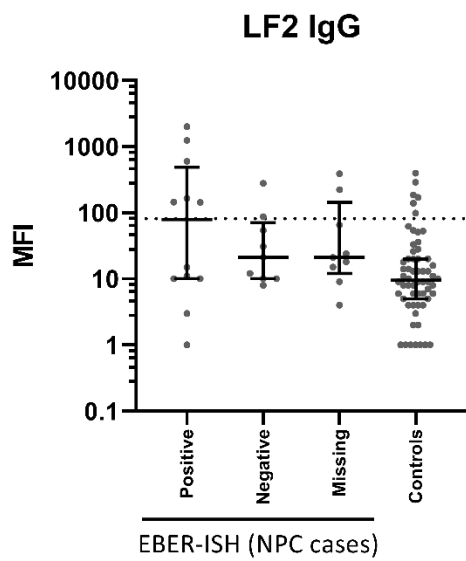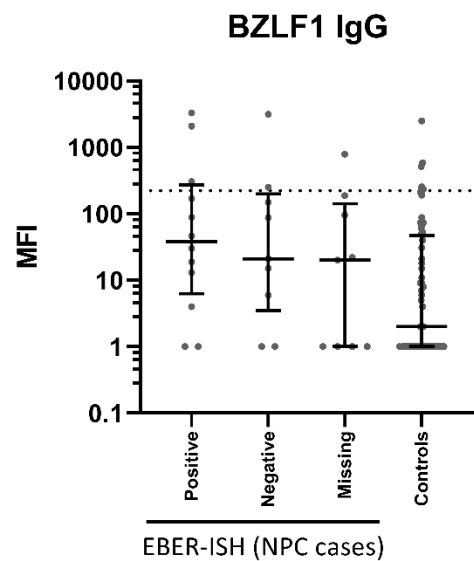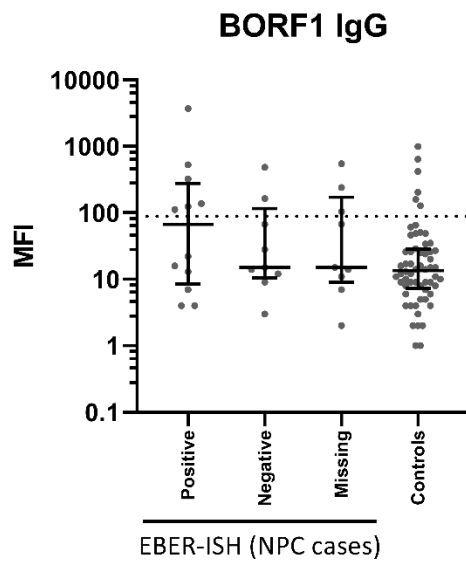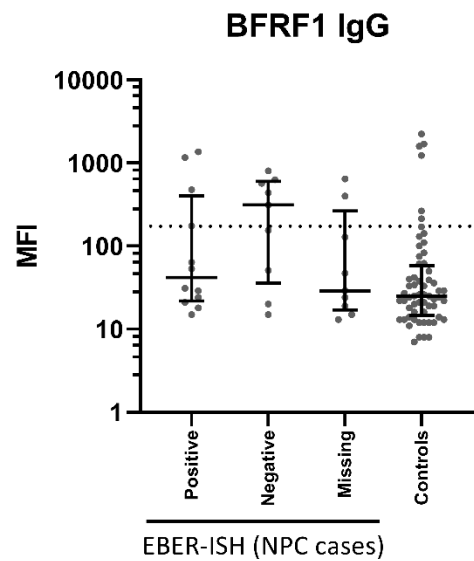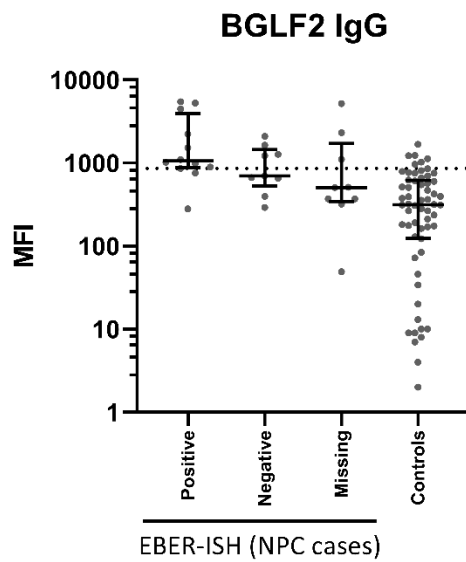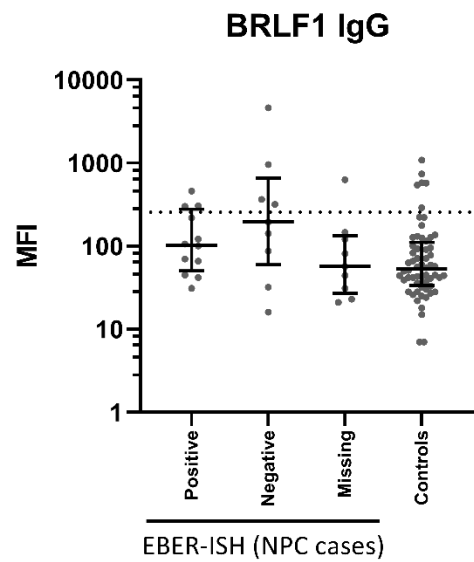

**BPLF1 IgG**

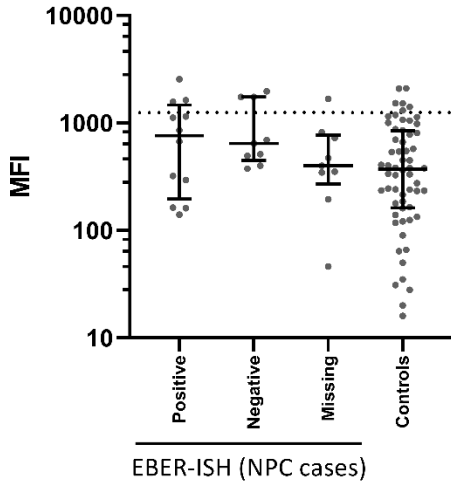

**VCAP40 IgG**

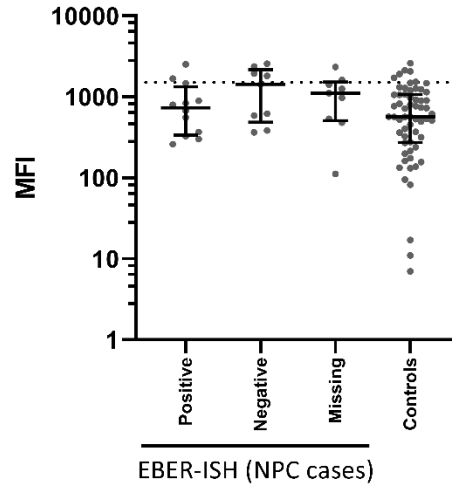

**BHRF1 IgG**

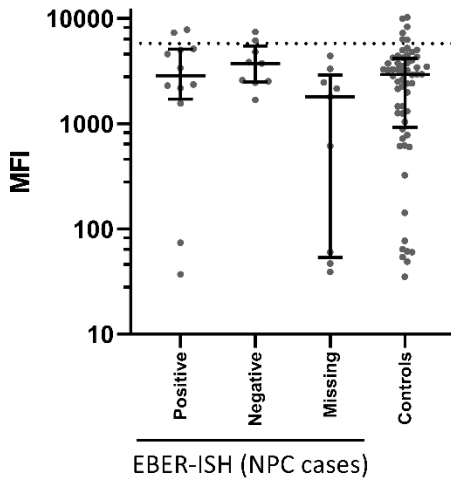

**BBRF1 IgG**

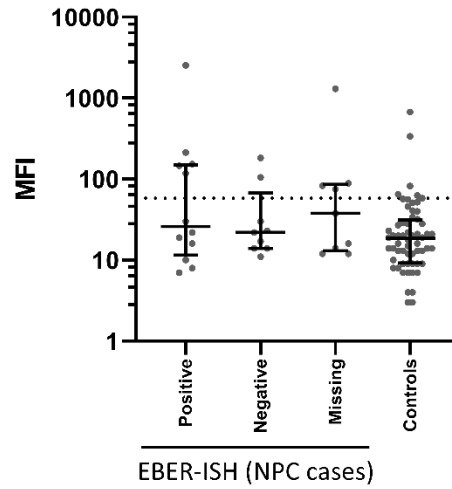

**BaRF1 IgG**

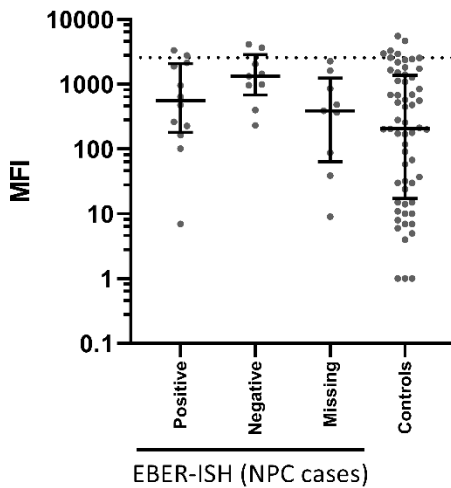

MFI = Median fluorescence intensity
